# Supplementary material for: Reviving ancient therapeutics in modern medicine: an immunological and biological narrative review of wet cupping in the management of Hashimoto’s thyroiditis
Source: PubMed Central journal article supplement — Gland Surg. 2024 Jul 24;13(7):1291–304. doi: 10.21037/gs-24-173 (PMC11336799; doi:10.21037/gs-24-173), 2024-07-24
Supplement: gs-13-07-1291-rc.pdf [file gs-13-07-1291-rc.pdf]

## Narrative Review Checklist

| Section/Topic             | Item No | Item                                                                                                                                                                               | Reported on Page Number/Line Number | Reported on Section/Paragraph     |
|---------------------------|---------|------------------------------------------------------------------------------------------------------------------------------------------------------------------------------------|-------------------------------------|-----------------------------------|
| <b>TITLE</b>              |         |                                                                                                                                                                                    |                                     |                                   |
| Title                     | 1       | Identify the report as a Narrative Review or Literature Review.                                                                                                                    | p. 1 / Line 3                       | Title                             |
| <b>ABSTRACT</b>           |         |                                                                                                                                                                                    |                                     |                                   |
| Structured summary        | 2       | Provide a structured summary with the subsections as: Background and Objective, Methods, Key Content and Findings, Conclusions.                                                    | p. 2 / Line 30-49                   | Abstract                          |
| <b>INTRODUCTION</b>       |         |                                                                                                                                                                                    |                                     |                                   |
| Rationale/background      | 3       | Describe the rationale for the review in the context of what is already known.                                                                                                     | p. 3-4 /Line 99-105                 | Introduction                      |
| Objectives                | 4       | Specify the key question(s) identified for the review topic.                                                                                                                       | p. 4 / Line 110-116                 | Introduction                      |
| <b>METHODS</b>            |         |                                                                                                                                                                                    |                                     |                                   |
| Research selection        | 5       | Specify the process for identifying the literature search (eg, years considered, language, publication status, study design, and databases of coverage).                           | p. 4-5 / Line 119-129               | Methods                           |
| <b>DISCUSSION/SUMMARY</b> |         |                                                                                                                                                                                    |                                     |                                   |
| Narrative                 | 6       | Discuss: 1) research reviewed including fundamental or key findings, 2) limitations and/or quality of research reviewed, and 3) need for future research.                          | p. 5-16 / Line 132-393              | Key content and findings          |
| Summary                   | 7       | Provide an overall interpretation of the narrative review in the context of clinical practice for health professionals, policy development and implementation, or future research. | p. 16-18 / Line 396-445             | Conclusions and future directions |

Article information: <https://dx.doi.org/10.21037/gs-24-173>

\*As the checklist was provided upon initial submission, the page number/line number reported may be changed due to copyediting and may not be referable in the published version. In this case, the section/paragraph may be used as an alternative reference.
